# Supplementary material for: DSPP dosage affects tooth development and dentin mineralization
Source: PubMed Central journal article supplement (PMC8153449; doi:10.1371/journal.pone.0250429), 2021-05-26
Supplement: pone.0250429.s002.pdf [file pone.0250429.s002.pdf]

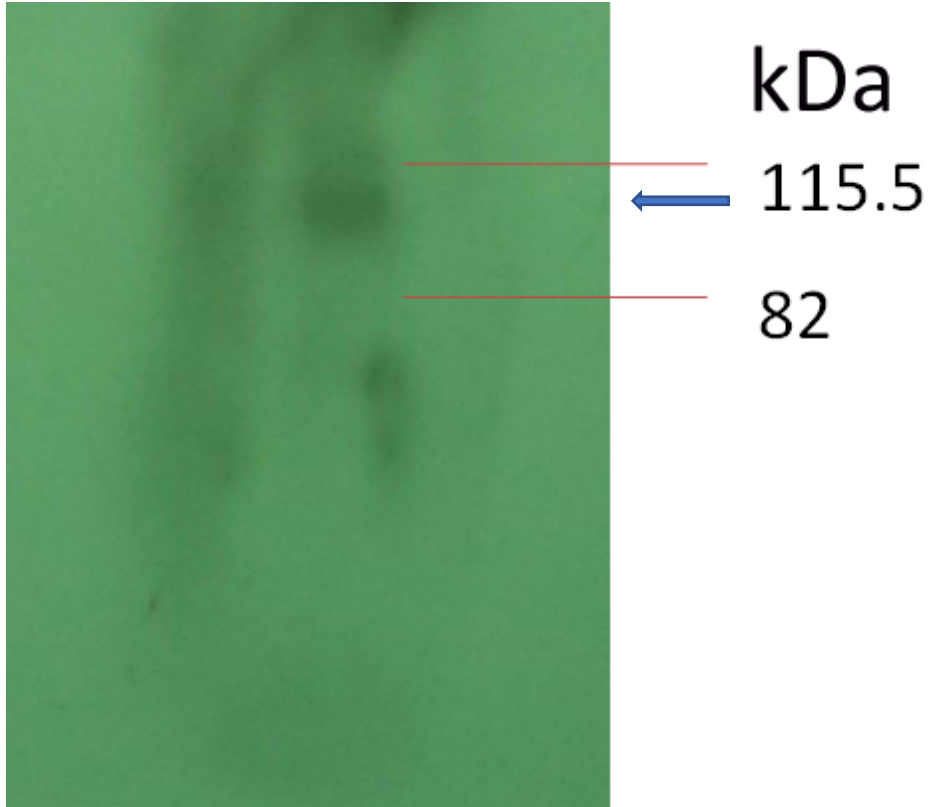

**S2 Fig. Western blot analyses of the minor band isolated from wt incisors as DSP protein.** Using anti-DSP antibodies, the minor band was DSP protein.
