# Supplementary material for: DSPP dosage affects tooth development and dentin mineralization
Source: PubMed Central journal article supplement (PMC8153449; doi:10.1371/journal.pone.0250429), 2021-05-26
Supplement: pone.0250429.s003.pdf [file pone.0250429.s003.pdf]

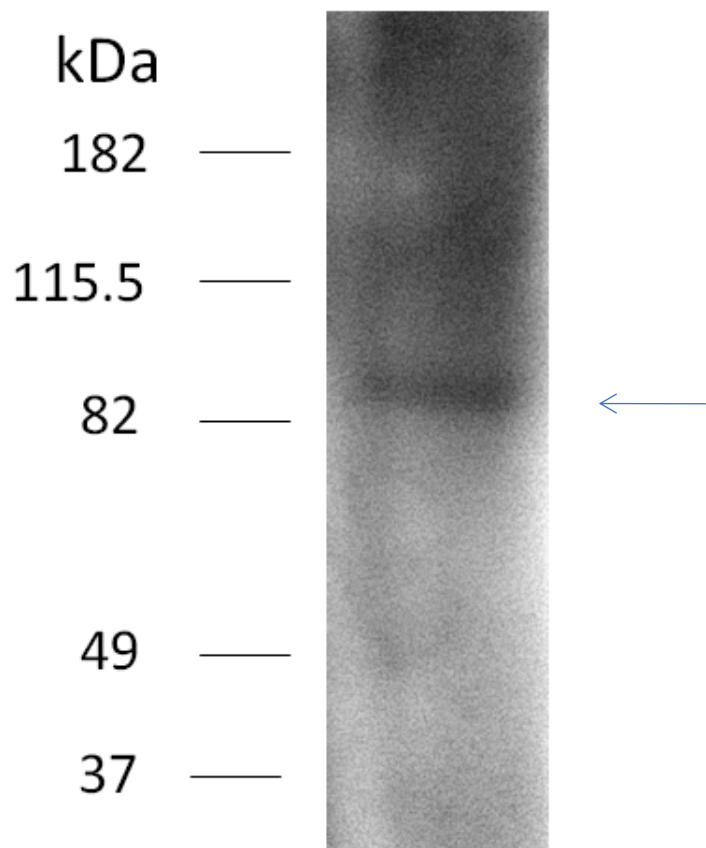

**S3 Fig. Western blot analyses of the major band isolated from wt incisors as PP protein.** Using anti-PP antibodies, the lower major blue band was PP protein. Above 115.5 kDa, the detected bands likely represent PP dimers and trimers.
