# Supplementary material for: DSPP dosage affects tooth development and dentin mineralization
Source: PubMed Central journal article supplement (PMC8153449; doi:10.1371/journal.pone.0250429), 2021-05-26
Supplement: pone.0250429.s005.pdf [file pone.0250429.s005.pdf]

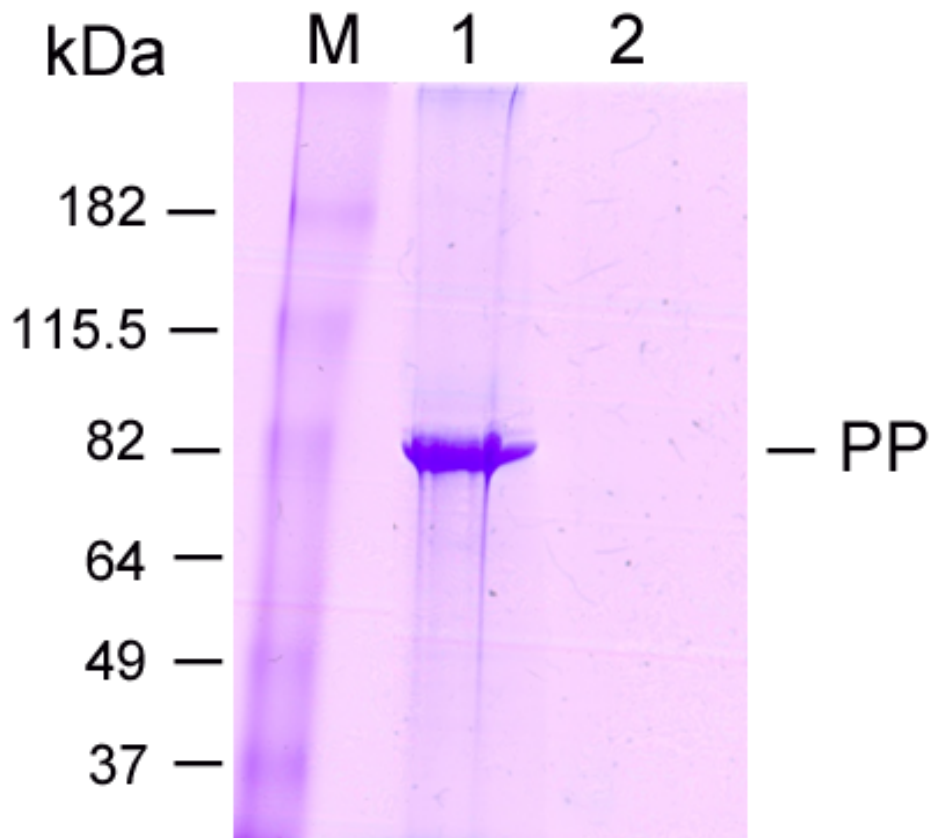

**S5 Fig. Isolation and Stains-All staining of acidic proteins from mouse incisor extraction of wt and DSPP KO mice.** M: size marker. Lane 1: wt sample was loaded without dilution. A major blue band was detected around 82 kDa, which represented PP. Lane 2: DSPP KO sample was loaded without dilution. No blue PP band was detected.
